# Supplementary material for: Facile synthesis of nanostructured reduced titanium oxides using borohydride toward the creation of oxide-based fuel cell electrodes
Source: Royal Society of Chemistry journal article supplement (doi:10.1039/c2cc33532h), 2012-01-01
Supplement: c2cc33532h.pdf [file c2cc33532h.pdf]

Supplementary information

**Facile Synthesis of Nanostructured Reduced Titanium Oxides  
Using Borohydride Toward the Creation of Oxide-Based Fuel Cell  
Electrodes**

**Satoshi Tominaka**

*International Center for Materials Nanoarchitectonics (WPI-MANA), National Institute  
for Materials Science (NIMS), Namiki 1-1, Tsukuba, Ibaraki 305-0044, Japan. E-mail:  
TOMINAKA.Satoshi@nims.go.jp. Tel: +81-29-860-4594.*

Contents:

1. Experimental details
2. Additional data
  - **Table S1** Gibbs energy,  $\Delta G$ , of the oxidation of four reducing agents
  - **Figure S1** XRD patterns of the sample reduced in a form of pellets
  - **Figure S2** SEM image of the reduced nanorods compared with raw  $\text{TiO}_2$
3. Additional acknowledgements

## 1. Experimental details

### Instruments and measurements

- XRD: X-ray diffraction (XRD) patterns obtained using a RINT RAPID-Sdiffractometer (Rigaku, Tokyo, Japan) with an imaging plate by Cu K $\alpha$  irradiation in transmission mode. The samples were packed in 0.2 mm $\phi$  Lindemann glass capillaries (Mark tube from Hilgenberg GmbH, Malsfeld, Germany), and the background was subtracted using the data obtained for an empty capillary.
- UV-vis-NIR: The diffuse reflectance spectra of the powder samples diluted with dry KCl powder to be 1 wt% were measured using a V-570 UV-vis-NIR spectrometer (JASCO, Tokyo, Japan) with an ISN-470 integrating sphere detector in the wavelength range from 2000 to 220 nm.
- SEM: SU-8000 microscope from Hitachi High-Technologies, Tokyo, Japan. The images were obtained at 1.0 kV adjusted by the deceleration technology without coating the samples with conductors such as Pt and carbon.
- The cross-sectional transmission electron microscope (TEM) samples were prepared using the focused-ion beam and micro-sampling method on an FB-2100 FIB system (Hitachi High-Technologies, Tokyo, Japan). The TEM observation and electron energy loss spectroscopy (EELS) measurements were performed using a JEM-2100F microscope (JEOL, Tokyo Japan) at 200 kV.
- The temperature dependence of the resistance was measured from 8 to 300 K at ca.  $1.2 \times 10^{-5}$  Pa using a four probe method (bias:  $\pm 0.5$  V) with a GRAIL 10-408040LV cryogenic electrical characteristic measurement system (Nagase Techno-Engineering, Tokyo, Japan) and a 4200-SCS semiconductor characterization system (Keithley Instruments, Tokyo, Japan). The reduced single crystals of (100)-oriented rutile TiO $_2$  were carefully cut into 2 mm  $\times$  5 mm pieces using the dicing saw. Then, four Au lines 100- $\mu$ m wide (100-nm thick with a 10-nm Ti adhesion layer) were deposited by electron beam evaporation through a Si stencil mask. The width and length of the conduction pathway was defined by the mask. The thickness of the reduced region was measured by cross-sectional TEM observation of the fabricated samples using a focused ion beam.
- Electrochemical instrument: HZ-3000 from Hokuto Denko, Tokyo, Japan. The geometrical surface area of the working electrode was 0.46 cm $^2$ .

### Materials and chemicals

- NaBH $_4$ : Reagent Grade from Kanto Chemical, Tokyo, Japan.
- TiO $_2$  single crystals: 10 mm  $\times$  10 mm, 0.5 mm thick crystals purchased from Furuuchi Chemical, Tokyo, Japan.
- TiO $_2$  nanorods: FTL-100 from Ishihara Sangyo, Osaka, Japan.
- H $_2$ SO $_4$ : Super Special Grade from Wako Pure Chemical Industries, Osaka, Japan.
- Water for electrochemistry: Millipore water.

## 2. Additional data

**Table S1** Gibbs energy,  $\Delta G$ , of the oxidation of four reducing agents

|                       | $-\Delta G^a / \text{kJ mol}^{-1}$ |       |        |
|-----------------------|------------------------------------|-------|--------|
|                       | 25°C                               | 350°C | 1000°C |
| NaBH <sub>4</sub> (s) | 313.7                              | 321.9 | 338.3  |
| CaH <sub>2</sub> (s)  | 377.5                              | 384.3 | 398.0  |
| NaH (s)               | 346.2                              | 354.1 | 370.0  |
| H <sub>2</sub> (g)    | 237.1                              | 217.4 | 177.9  |

<sup>a</sup> These values were calculated using the standard Gibbs energies of formation and the standard entropies, for the formation of the most stable products at room temperature (without consideration on thermal decomposition of the hydrides):  $4\text{NaBH}_4 + 8\text{O}_2 \rightarrow \text{Na}_2\text{B}_4\text{O}_7 + 2\text{NaOH} + 7\text{H}_2\text{O}$ ,  $\text{CaH}_2 + \text{O}_2 \rightarrow \text{Ca(OH)}_2$ ,  $2\text{NaH} + \text{O}_2 \rightarrow 2\text{NaOH}$ , and  $2\text{H}_2 + \text{O}_2 \rightarrow 2\text{H}_2\text{O}$ . All the values were normalized for one oxygen atom.

10

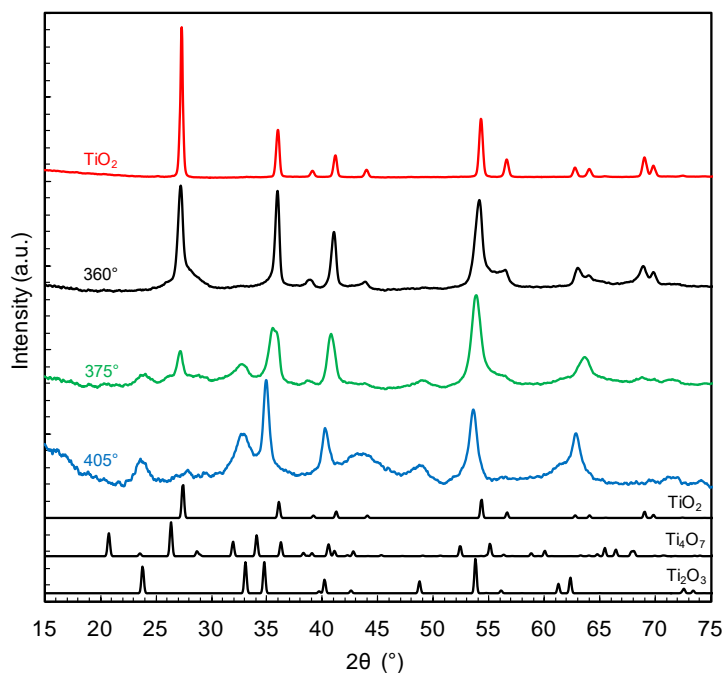

**Figure S1** XRD patterns of rutile TiO<sub>2</sub> nanorods reduced using NaBH<sub>4</sub> at a different temperature for 24 h. Pressed pellets were formed from the TiO<sub>2</sub> powder mechanically mixed with the NaBH<sub>4</sub> powder, and then annealed in Ar. The three black patterns shown at the bottom are reported patterns of rutile TiO<sub>2</sub> (ICSD no. 9161), Magnéli phase Ti<sub>4</sub>O<sub>7</sub> (no. 4813) and corundum Ti<sub>2</sub>O<sub>3</sub> (no. 9646).

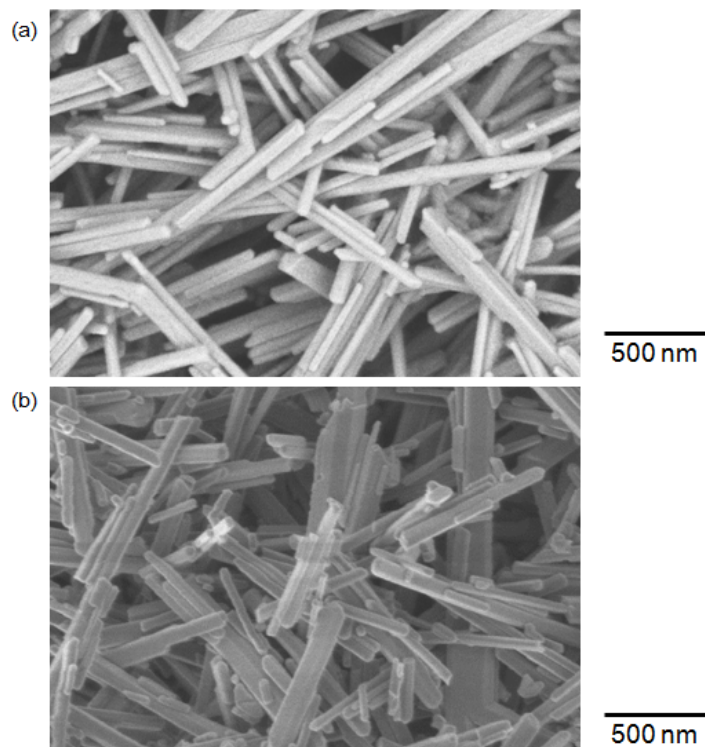

**Figure S2** Low-voltage high resolution SEM image of the rutile-type TiO<sub>2</sub> nanorods reduced using NaBH<sub>4</sub> at 375°C for 24 h (a), compared with that of precursor TiO<sub>2</sub> (b). These images were obtained without surface coating.

10

### 3. Additional Acknowledgements

ST thanks T. Narushima (NIMS) for help in TEM sample preparation, I. Yamada (NIMS) for help in TEM observation, Y. Tsujimoto (NIMS) for help in pellets formation for Figure S1, and MANA foundary (NIMS) for help in conductivity  
15 measurements.
